# Supplementary material for: Genome-wide identification of the auxin response factor gene family in Cicer arietinum
Source: PubMed Central journal article supplement (PMC5921756; doi:10.1186/s12864-018-4695-9), 2018-04-27

CaARF3, 6, 7, 12, 13, 15, 20

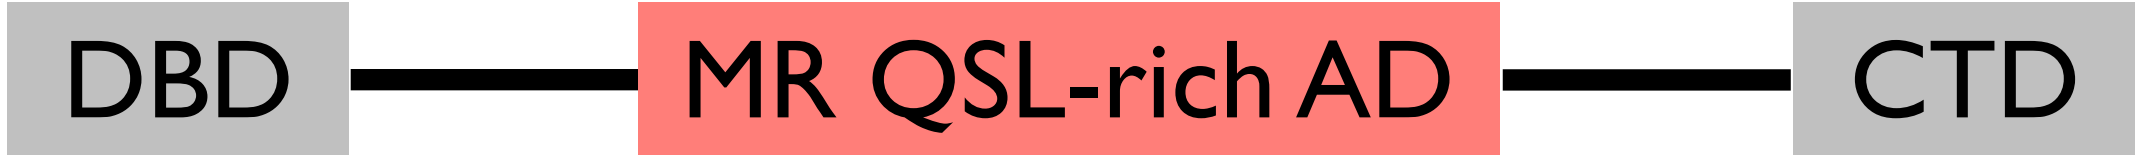

CaARF1, 4, 5, 9, 10, 11, 14, 17, 18, 19, 22

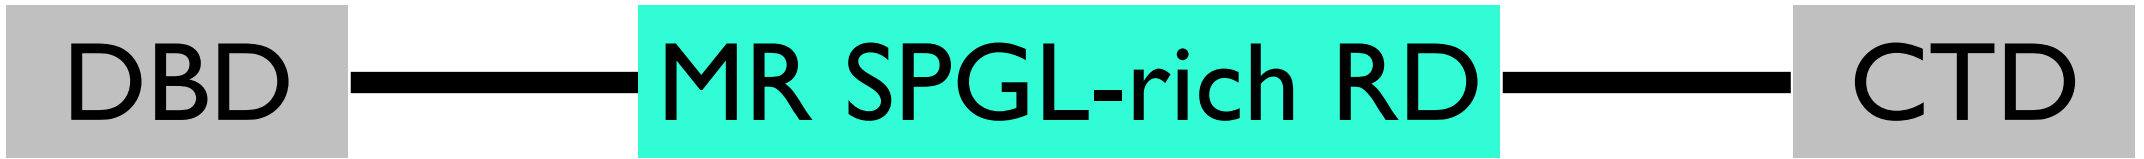

CaARF2, 8, 16, 21, 23, 24

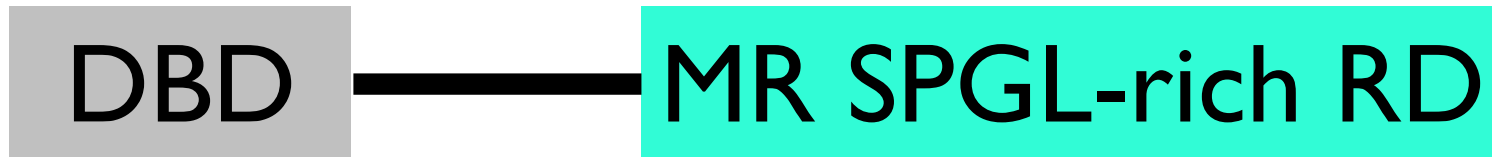

Supplement: 12864_2018_4695_MOESM4_ESM.pdf [file 12864_2018_4695_MOESM4_ESM.pdf]
