# Supplementary material for: Genome-wide identification of the auxin response factor gene family in Cicer arietinum
Source: PubMed Central journal article supplement (PMC5921756; doi:10.1186/s12864-018-4695-9), 2018-04-27

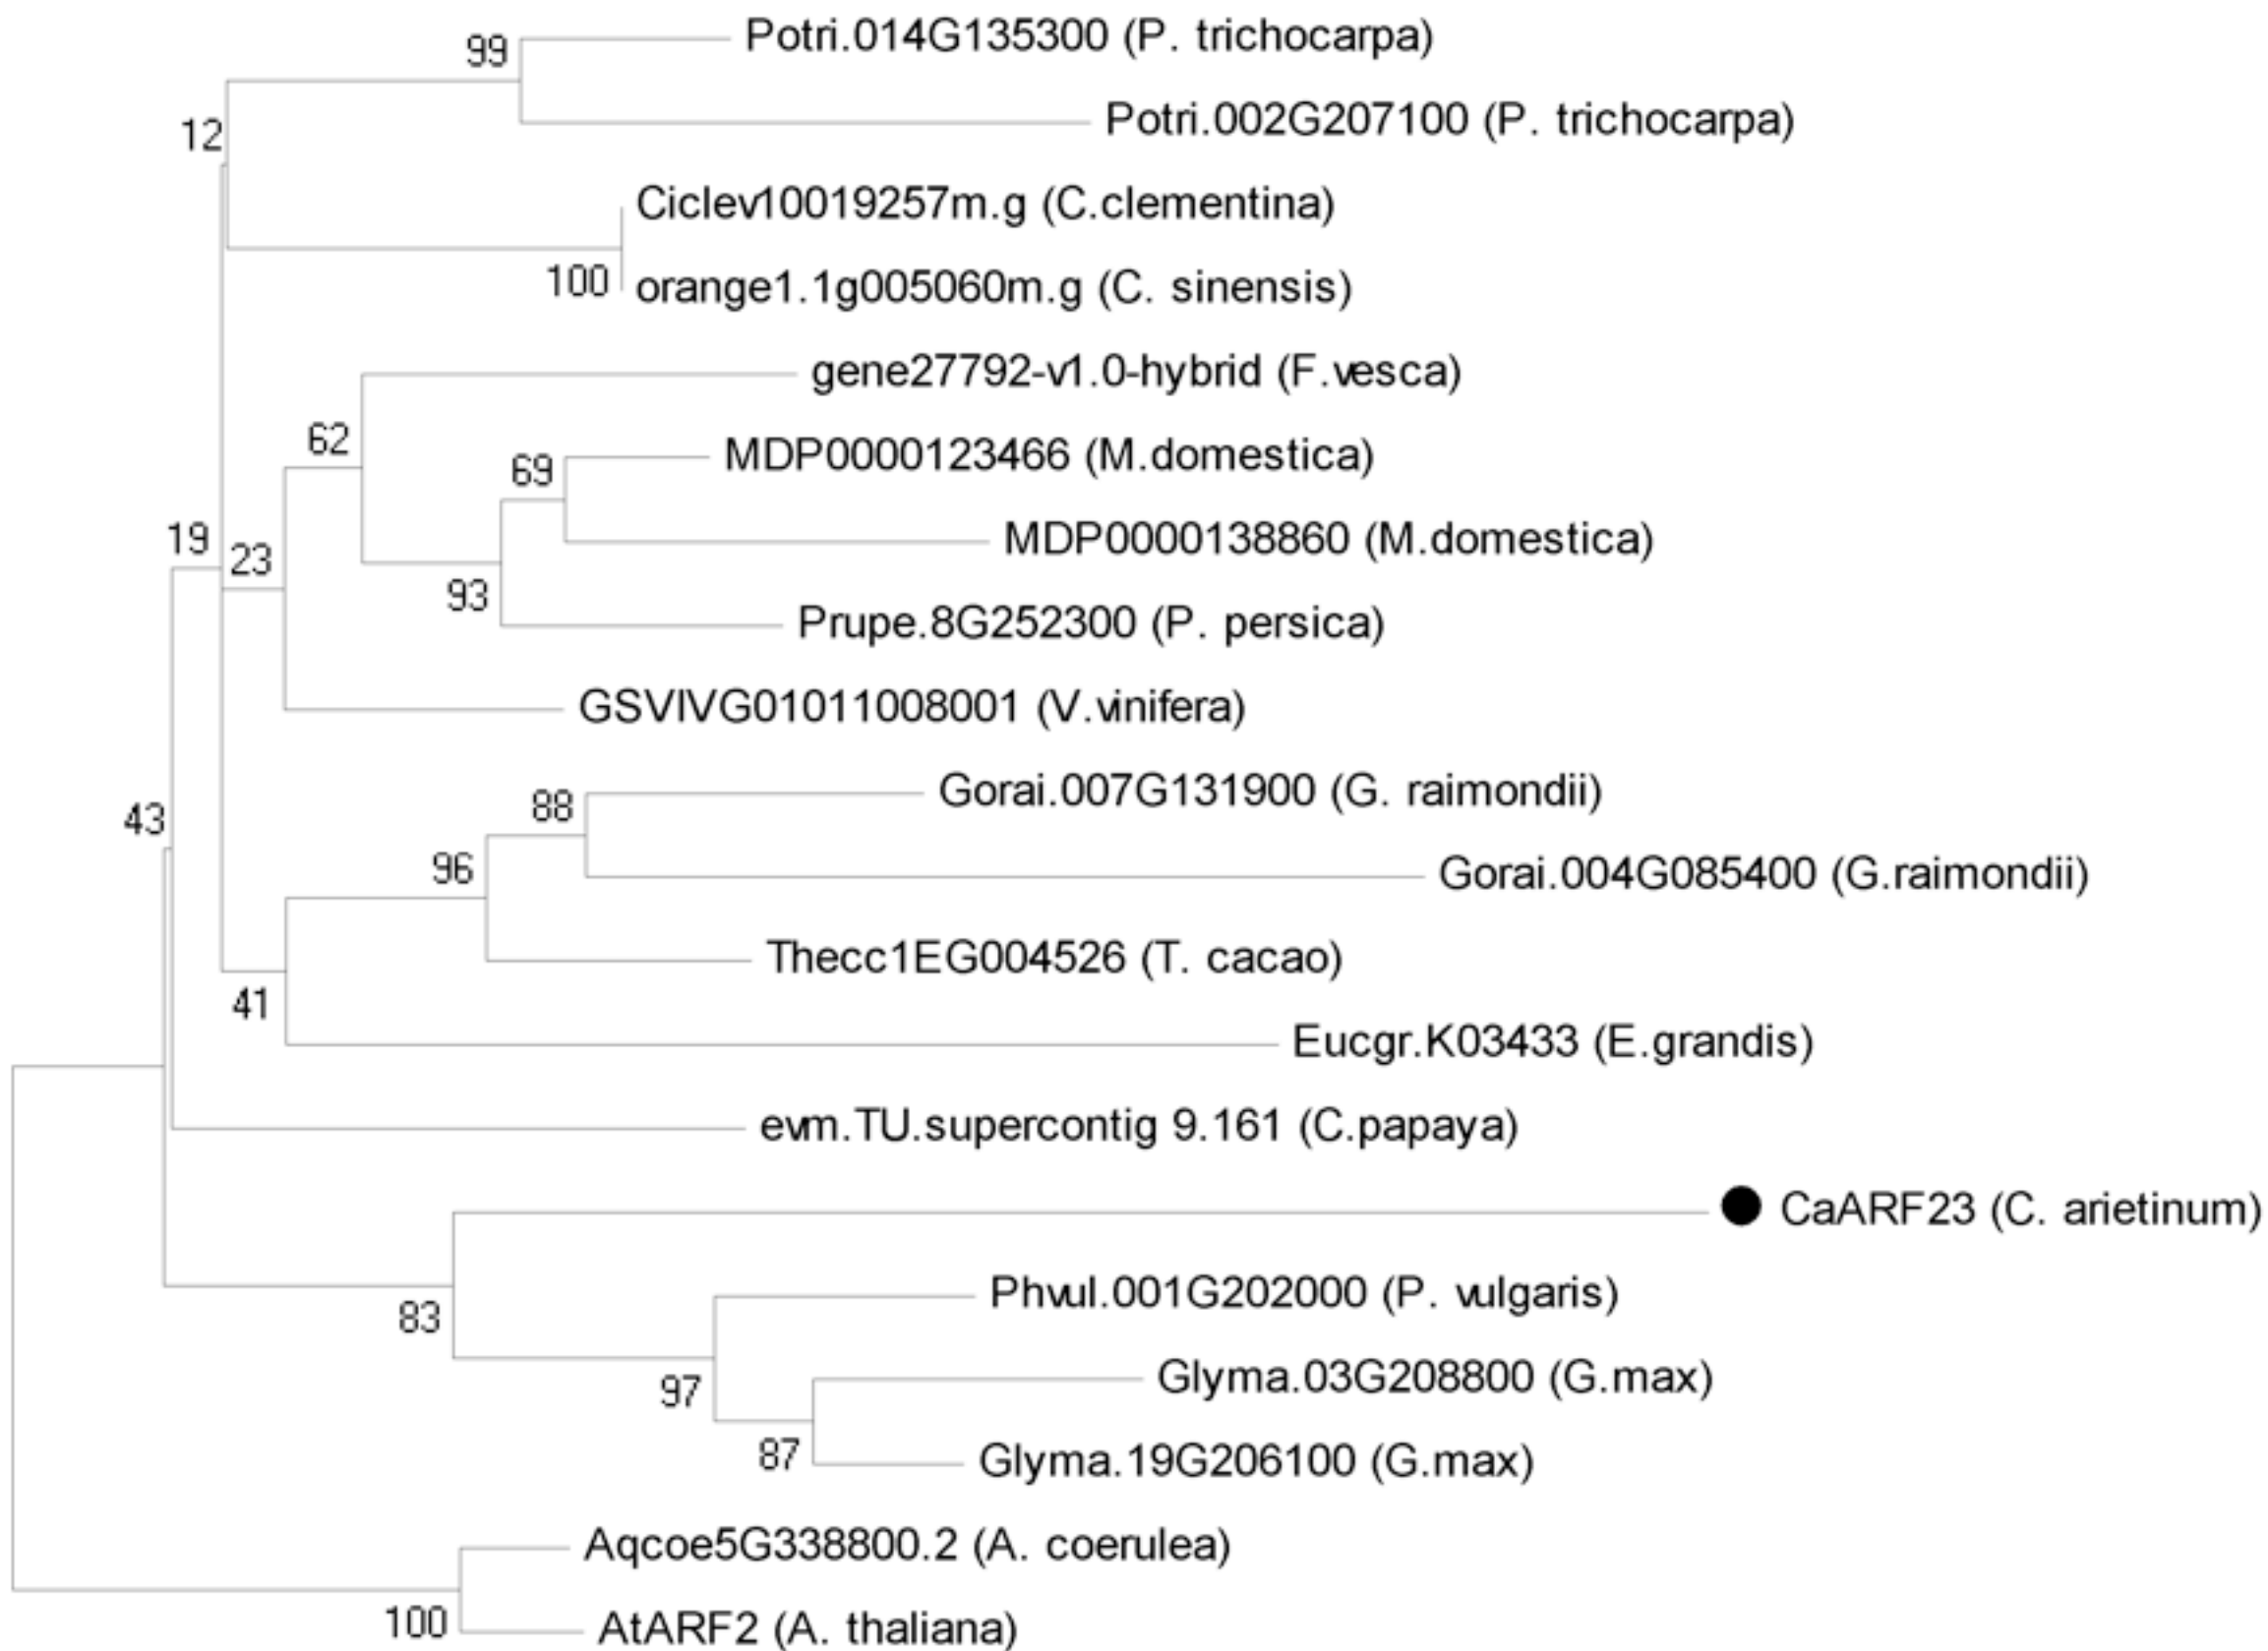

Supplement: 12864_2018_4695_MOESM5_ESM.pdf [file 12864_2018_4695_MOESM5_ESM.pdf]
