# Supplementary material for: Genome-wide identification of the auxin response factor gene family in Cicer arietinum
Source: PubMed Central journal article supplement (PMC5921756; doi:10.1186/s12864-018-4695-9), 2018-04-27
Supplement: 12864_2018_4695_MOESM9_ESM.pdf [file 12864_2018_4695_MOESM9_ESM.pdf]

**Table S1.** Domain positions in 24 CaARF proteins.

| RefSeq protein | Gene ID      | Gene name      | Length (aa) | DBD (aa) | MR (aa) | CTD (aa)             |
|----------------|--------------|----------------|-------------|----------|---------|----------------------|
| XP_004485416   | LOC101492112 | <i>CaARF1</i>  | 670         | 21-375   | 376-470 | 471-635              |
| XP_004485844   | LOC101513952 | <i>CaARF2</i>  | 711         | 46-403   | 404-568 | None <sup>1</sup>    |
| XP_004485979   | LOC101501408 | <i>CaARF3</i>  | 908         | 22-379   | 380-657 | 658-864              |
| XP_004487099   | LOC101509547 | <i>CaARF4</i>  | 719         | 10-412   | 413-546 | 547-692 <sup>2</sup> |
| XP_012571810   | LOC101492916 | <i>CaARF5</i>  | 826         | 62-426   | 427-624 | 625-787              |
| XP_004488112   | LOC101498659 | <i>CaARF6</i>  | 1120        | 22-377   | 378-815 | 816-1082             |
| XP_004490754   | LOC101504978 | <i>CaARF7</i>  | 833         | 23-380   | 381-601 | 602-796              |
| XP_004490828   | LOC101503141 | <i>CaARF8</i>  | 504         | 11-366   | 367-405 | None <sup>1</sup>    |
| XP_012568938   | LOC101491204 | <i>CaARF9</i>  | 671         | 13-368   | 369-496 | 497-649              |
| XP_004497510   | LOC101505543 | <i>CaARF10</i> | 692         | 22-423   | 424-543 | 544-684 <sup>2</sup> |
| XP_012570835   | LOC101509304 | <i>CaARF11</i> | 917         | 44-399   | 400-681 | 682-900              |
| XP_012571326   | LOC101496441 | <i>CaARF12</i> | 853         | 25-382   | 381-620 | 621-815              |
| XP_004503553   | LOC101504083 | <i>CaARF13</i> | 1120        | 35-392   | 393-788 | 789-1097             |
| XP_004503803   | LOC101498188 | <i>CaARF14</i> | 867         | 62-417   | 418-561 | 562-833              |
| XP_004504542   | LOC101500671 | <i>CaARF15</i> | 918         | 22-378   | 379-672 | 673-874              |
| XP_004505103   | LOC101493974 | <i>CaARF16</i> | 725         | 41-400   | 401-561 | None <sup>1</sup>    |
| XP_012572776   | LOC101505359 | <i>CaARF17</i> | 807         | 59-424   | 425-605 | 606-768              |
| XP_004506012   | LOC101492451 | <i>CaARF18</i> | 706         | 11-406   | 407-532 | 533-679 <sup>2</sup> |
| XP_012572936   | LOC101515039 | <i>CaARF19</i> | 691         | 21-377   | 378-500 | 501-667              |
| XP_004508019   | LOC101489666 | <i>CaARF20</i> | 1125        | 22-377   | 378-824 | 825-1087             |
| XP_004510646   | LOC101514738 | <i>CaARF21</i> | 612         | 30-419   | 420-524 | None <sup>1</sup>    |
| XP_004510662   | LOC101492136 | <i>CaARF22</i> | 679         | 27-380   | 381-496 | 497-648              |
| XP_004511136   | LOC101505502 | <i>CaARF23</i> | 444         | 21-359   | 360-361 | None <sup>1</sup>    |
| XP_012567350   | LOC101514889 | <i>CaARF24</i> | 598         | 18-400   | 401-488 | None <sup>1</sup>    |

<sup>1</sup> Without domain III, IV : 2,8,16,21,23,24

<sup>2</sup> Without domain IV: 4,10,18
