# Supplementary material for: Genome-wide identification of the auxin response factor gene family in Cicer arietinum
Source: PubMed Central journal article supplement (PMC5921756; doi:10.1186/s12864-018-4695-9), 2018-04-27
Supplement: 12864_2018_4695_MOESM10_ESM.pdf [file 12864_2018_4695_MOESM10_ESM.pdf]

**Table S2.** Data of amino acid content in MR domain of CaARFs.

| Gene           | Gln (Q) | Ser (S) | Pro (P) | Gly (G) | Leu (L) | Enrichment | HMM        |
|----------------|---------|---------|---------|---------|---------|------------|------------|
| <i>CaARF1</i>  | 0.03    | 0.18    | 0.12    | 0.11    | 0.05    | SPGL       | DBD-MR-CTD |
| <i>CaARF2</i>  | 0.06    | 0.12    | 0.07    | 0.13    | 0.06    | SPGL       | DBD-MR     |
| <i>CaARF3</i>  | 0.18    | 0.12    | 0.08    | 0.04    | 0.1     | QSL        | DBD-MR-CTD |
| <i>CaARF4</i>  | 0.03    | 0.12    | 0.07    | 0.05    | 0.09    | SPGL       | DBD-MR-CTD |
| <i>CaARF5</i>  | 0.07    | 0.12    | 0.05    | 0.07    | 0.1     | SPGL       | DBD-MR-CTD |
| <i>CaARF6</i>  | 0.29    | 0.11    | 0.09    | 0.03    | 0.12    | QSL        | DBD-MR-CTD |
| <i>CaARF7</i>  | 0.18    | 0.12    | 0.05    | 0.1     | 0.14    | QSL        | DBD-MR-CTD |
| <i>CaARF8</i>  | 0.03    | 0.18    | 0.03    | 0.05    | 0.08    | SPGL       | DBD-MR     |
| <i>CaARF9</i>  | 0.03    | 0.16    | 0.05    | 0.03    | 0.05    | SPGL       | DBD-MR-CTD |
| <i>CaARF10</i> | 0.06    | 0.15    | 0.1     | 0.06    | 0.11    | SPGL       | DBD-MR-CTD |
| <i>CaARF11</i> | 0.1     | 0.1     | 0.1     | 0.02    | 0.1     | SPGL       | DBD-MR-CTD |
| <i>CaARF12</i> | 0.17    | 0.1     | 0.08    | 0.08    | 0.14    | QSL        | DBD-MR-CTD |
| <i>CaARF13</i> | 0.19    | 0.12    | 0.09    | 0.03    | 0.1     | QSL        | DBD-MR-CTD |
| <i>CaARF14</i> | 0.04    | 0.17    | 0.08    | 0.07    | 0.07    | SPGL       | DBD-MR-CTD |
| <i>CaARF15</i> | 0.22    | 0.11    | 0.08    | 0.04    | 0.09    | QSL        | DBD-MR-CTD |
| <i>CaARF16</i> | 0.07    | 0.14    | 0.06    | 0.1     | 0.07    | SPGL       | DBD-MR     |
| <i>CaARF17</i> | 0.06    | 0.13    | 0.04    | 0.09    | 0.07    | SPGL       | DBD-MR-CTD |
| <i>CaARF18</i> | 0.06    | 0.11    | 0.06    | 0.07    | 0.11    | SPGL       | DBD-MR-CTD |
| <i>CaARF19</i> | 0.05    | 0.15    | 0.05    | 0.03    | 0.07    | SPGL       | DBD-MR-CTD |
| <i>CaARF20</i> | 0.27    | 0.12    | 0.08    | 0.03    | 0.12    | QSL        | DBD-MR-CTD |
| <i>CaARF21</i> | 0.1     | 0.15    | 0.08    | 0.02    | 0.09    | SPGL       | DBD-MR     |
| <i>CaARF22</i> | 0.03    | 0.1     | 0.08    | 0.05    | 0.07    | SPGL       | DBD-MR-CTD |
| CaARF23        | 0       | 0.5     | 0       | 0       | 0       | SPGL       | DBD-MR     |
| CaARF24        | 0.03    | 0.15    | 0.03    | 0.14    | 0.11    | SPGL       | DBD-MR     |
