# Supplementary material for: Genome-wide identification of the auxin response factor gene family in Cicer arietinum
Source: PubMed Central journal article supplement (PMC5921756; doi:10.1186/s12864-018-4695-9), 2018-04-27
Supplement: 12864_2018_4695_MOESM11_ESM.pdf [file 12864_2018_4695_MOESM11_ESM.pdf]

**Table S3.** Duplicated gene pairs of *CaARF* genes with Ka / Ks values and time of duplication.

| Duplicated gene pair    | Ka   | Ks   | Ka / Ks | Mya (Time) |
|-------------------------|------|------|---------|------------|
| <i>CaARF2 - CaARF16</i> | 0.19 | 0.60 | 0.32    | 49.18      |
| <i>CaARF4 - CaARF10</i> | 0.33 | 1.64 | 0.20    | 134.43     |
| <i>CaARF4 - CaARF18</i> | 0.18 | 0.66 | 0.27    | 54.10      |
| <i>CaARF5 - CaARF17</i> | 0.19 | 0.64 | 0.30    | 52.46      |
| <i>CaARF6 - CaARF20</i> | 0.09 | 0.76 | 0.12    | 62.30      |
| <i>CaARF7 - CaARF12</i> | 0.08 | 0.59 | 0.14    | 48.36      |
| <i>CaARF9 - CaARF19</i> | 0.10 | 0.92 | 0.11    | 75.41      |
