# Supplementary material for: Genome-wide identification of the auxin response factor gene family in Cicer arietinum
Source: PubMed Central journal article supplement (PMC5921756; doi:10.1186/s12864-018-4695-9), 2018-04-27
Supplement: 12864_2018_4695_MOESM12_ESM.pdf [file 12864_2018_4695_MOESM12_ESM.pdf]

**Table S4.** Tissue distribution profile of chickpea ARF genes according to the number of expressed sequence tags (ESTs) present in NCBI's EST Database.

| Gene Name      | Gene ID      | EST tissue | Accession | Genotype                              | Reference |
|----------------|--------------|------------|-----------|---------------------------------------|-----------|
| <i>CaARF1</i>  | LOC101492112 | root       | HO067475  | RIL from the cross<br>ICC4958xICC1882 | [1]       |
| <i>CaARF1</i>  | LOC101492112 | leaf       | FE670495  | XJ-209                                | [2]       |
| <i>CaARF2</i>  | LOC101513952 | leaf       | FE670500  | XJ-209                                | [2]       |
| <i>CaARF3</i>  | LOC101501408 | root       | GR403988  | ICCV2                                 | [3]       |
| <i>CaARF7</i>  | LOC101504978 | leaf       | ES560336  | Pusa-362                              | [4]       |
| <i>CaARF12</i> | LOC101496441 | leaf       | ES560336  | Pusa-362                              | [4]       |
| <i>CaARF14</i> | LOC101498188 | shoot      | HO066200  | ICC4958                               | [1]       |
| <i>CaARF14</i> | LOC101498188 | embryo     | JK709419  | ICCV2                                 | [5]       |
| <i>CaARF15</i> | LOC101500671 | leaf       | FE671045  | XJ-209                                | [2]       |
| <i>CaARF15</i> | LOC101500671 | root       | GR403988  | ICCV2                                 | [3]       |
| <i>CaARF20</i> | LOC101489666 | root       | HO064721  | ICC4958                               | [1]       |
| <i>CaARF23</i> | LOC101505502 | root       | HO064459  | ICC4958                               | [1]       |
| <i>CaARF23</i> | LOC101505502 | root       | HO062185  | ICC4958                               | [1]       |
| <i>CaARF23</i> | LOC101505502 | root       | GR399001  | ICC4958                               | [3]       |

[1] Deokar, A.A., Kondawar, V., Jain, P.K. et al. Comparative analysis of expressed sequence tags (ESTs) between drought-tolerant and -susceptible genotypes of chickpea under terminal drought stress. *BMC Plant Biology* (2011) 11:70

[2] Gao, W.R., Wang, X-S., Liu, Q.Y. et al. Comparative analysis of ESTs in response to drought stress in chickpea (*C. arietinum* L.). *Biochem Biophysical Res Comm* (2008) 376:578-583

[3] Varshney RK, Hiremath PJ, Lekha P, et al. A comprehensive resource of drought- and salinity-responsive ESTs for gene discovery and marker development in chickpea (*Cicer arietinum* L.). *BMC Genomics* (2009) 10:523

[4] Jaiswal, P., Cheruku, J.R., Kumar, K. et al. Differential transcript accumulation in chickpea during early phases of compatible interaction with a necrotrophic fungus *Ascochyta rabiei*. *Mol Biol Rep* (2012) 39: 4635.

[5] Gupta S, Garg V, Bhatia S (2015) A New Set of ESTs from Chickpea (*Cicer arietinum* L.) Embryo Reveals Two Novel F-Box Genes, *CarF-box\_PP2* and *CarF-box\_LysM*, with Potential Roles in Seed Development. *PLoS ONE* 10(3): e0121100.
